# Supplementary material
Source: publisher site journal article supplement (https://www.spandidos-publications.com/8504/downloadSupplementary)
Supplement: Supplementary file 1 [file downloadSupplementary]

## Sheet: Table SI
Table SI. Information for studies included in the meta-analysis.
Patient no.	Sex	Age, years	Del/dup	Band	Location	UCSC genome reference	IGF1R gene del/dup chr15:98648539-98964530/38 chr15:99,191,768-99,507,759/37 chr15:97,010,284-97,325,282/36 chr15:97,010,284-97,325,282/35	NR2F2 gene del/dup 96,332,106-96,337,622/38 chr15:96874111-96883492 /37 chr15:94670279-94684489/36 chr15:94676798-94684496/35	MEF2A gene del/dup chr15:99565984-99716488/38 chr15:100106133-100256629/37 chr15:97956185-98071524/36 chr15:97956185-98071524/35	LRRK1 gene del/dup 100919357-101078257/38 101459460-101610317/37 99277085-99435984/36 99380195-99427834/35	r(15)	Size, Mb	SGA	LGA	Growth retardation/short stature	Tall stature/overgrowth	Cardiac malformation	Developmental delay	Microcephaly	Macrocephaly	Facial abnormality	Speech development delay	Hand/foot/skeleton malformation	Other features	First author	Year
1	M	6.4	del	15q26.3	NA		YES	NO	NA	NA	NO	NA	-	-	+	-	-	+	-	-	-	NA	-	Premature ventricular contraction	Kawashima-Sonoyama	2024
2	F	2.3	del	15q26-qter	NA		YES	NA	NA	NA	NO	NA	+	-	+	-	+	+	-	-	-	NA	-	Urolithiasis	Kawashima-Sonoyama	2024
3	F	1.5	del	15q26.3	NA		YES	NA	NA	NA	NO	3.273	+	-	+	-	+	NA	+	-	+	NA	-	-	Dincer	2024
4	F	5.3	del	15q26.2-q26.3	NA		YES	NA	NA	NA	NO	NA	+	-	+	-	-	NA	-	-	+	NA	+	General hypotonia, hypertelorism	Arroyo-Ruiz	2024
5	F	0.33	del	15q26.3	NA		NO	NO	NO	YES	NO	2.1	+	-	/	/	+	/	-	-	-	/	+	Pulmonary hypertension	Sivakumaran	2023
6	NA	infant	dup	15q26.3	99,282,850-99,627,413	GRCh37/hg19	YES(dup)	NO(DUP)	NO(DUP)	NO(DUP)	NO	345 kb	+	-	/	/	+	/	NA	NA	+	/	+	-	Kannan	2022
7	NA	infant	dup	15q26.3	99,282,850-99,627,413	GRCh37/hg19	YES(dup)	NO(DUP)	NO(DUP)	NO(DUP)	NO	345 kb	-	-	/	/	-	/	NA	NA	+	/	+	-	Kannan	2022
8	F	6.42	del	15q26.2q26.3	98,493,875–102,429,112	NA	YES	NO	YES	YES	NO	3.9	+	-	+	-	+	-	-	-	+	+	+	Idiopathic growth hormone deficiency	Yoon	2021
9	F	11.5	del	15q26.2-q26.3	98,000,001-102,500,000	GRCh37/hg19	YES	NO	YES	YES	YES	4.5	+	-	+	-	+	+	-	-	+	-	+	Ovarian cyst, café au lait spots	Chen	2021
10	F	4	del	15q26.1-q26.3	93,275,228-102,429,113	GRCh37/hg19	YES	YES	YES	YES	YES	9.15	+	-	+	-	+	+	+	-	+	-	+	Teething delay，divergent strabismus，congenital hypotonia，dorsal scoliosis，sensorineural hearing loss	Benbouchta	2021
11	F	30	dup	15q26.3	100,400,214- 102,429,112	NA	NO(DUP)	NO(DUP)	NO(DUP)	YES(dup)	YES	2	NA	NA	-	-	-	-	-	-	+	/	+	Infertility	Shao	2020
12	F	22	del	15q26.2-q26.3	96,878,099-102,397,836	GRCh37/hg19	YES	YES	YES	YES	NO	5.5	+	-	+	-	-	+	-	-	+	-	+	Hypotonia, anxiety and cognitive impairment, central obesity	Santos	2020
13	F	20	del	15q26.2	95,127,653-98,146,649	GRCh37/hg19	NO	YES	NO	NO	NO	3	-	-	-	-	-	NA	NA	NA	+	NA	+	46,XX ovotesticular differences/disorders of sex development	Carvalheira	2019
14	M	32	del	15q26.3	101,820,221-102,383,444	GRCh37/hg19	NO	NO	NO	YES	YES	563kb	+	-	-	-	-	+	+	-	+	-	+	Obesity，euthyroid goitre, generalized mild skin hypertrichosis,small penis, small bilateral testicular size, Café-au-lait spots	Kalantari	2018
15	M	infant	del	15q26.3	101,820,221-102,383,444	GRCh37/hg19	NO	NO	NO	YES	YES	563kb	+	-	/	/	NA	NA	-	-	NA	/	NA	-	Kalantari	2018
16	M	20	del	15q26.2-26.3	98,586,049-102,351,195	GRCh38/hg20	YES	NO	YES	YES	NO	6.554	-	-	+	-	+	+	+	-	+	+	+	Cutis aplasia of the occipital scalp, gliosis, neonatal lymphedema, café au lait spots	O'Riordan	2017
17	F	10	del	15q26.2-q26.3	97,457,185-102,399,819	GRCh37/hg19	YES	NO	YES	YES	NO	4.942	+	-	+	-	-	+	+	-	+	-	+	Café au lait spots	Pelosi	2017
18	F	6	del	15q26.2-qter	95.258 Mb ~ qter	arr[ph19]	YES	YES	YES	YES	YES	5	+	-	+	-	-	+	+	-	+	-	+	Café au lait spots	Cannarella	2017
19	M	19	dup	15q26.3	NA		YES(dup)	NA	NA	NA	NO	568kb	-	-	-	+	-	+	-	+	+	+	+	Left undescended testis, severe oligoasthenoteratozoospermia	Cannarella	2017
20	M	>18	dup	15q26.3	101,031,538-101,802,565	GRCh37/hg 19	NO(DUP)	NO(DUP)	NO(DUP)	YES(dup)	NO	770kb	NA	NA	-	+	NA	-	NA	NA	+	+	NA	-	Leffler	2016
21	M	12	dup	15q26.3	101,031,538-101,802,565	GRCh37/hg 19	NO(DUP)	NO(DUP)	NO(DUP)	YES(dup)	NO	770kb	-	-	-	+	-	-	-	-	+	+	+	-	Leffler	2016
22	M	8	dup	15q26.3	101,031,538-101,802,565	GRCh37/hg 19	NO(DUP)	NO(DUP)	NO(DUP)	YES(dup)	NO	770kb	-	-	-	-	-	-	-	-	+	+	+	-	Leffler	2016
23	M	15	del	15q26.1-q26.2	93,408,532–95,188,862	GRCh37/hg 19	NO	NO	NO	NO	NO	1.8	NA	NA	-	-	-	+	-	-	+	-	-	-	W. M. Verhoeven	2016
24	F	11	del	15q26.3	chr15:1017663392-102521392	GRCh37/hg19	NO	NO	NO	NO	NO	0.755	NA	NA	+	-	-	NA	-	-	+	+	+	-	A Ece Solmaz	2016
25	F	3	del	15q26.2-26.3	NA		YES	YES	YES	YES	NO	6.53	+	-	+	-	-	-	+	-	+	-	+	NT: 4.0 mm,a sacral dimple with a tuft of hair,a malrotated kidney	R. Reiss	2015
26	F	0.4	del	46.XX,r(15)(p11q26.3)	NA		YES	NA	NA	NA	YES	NA	-	-	+	-	-	+	-	-	+	/	-	-	S. C. Ho	2015
27	F	0.5	del	46,XX.r(15)(p13q26.2)	NA		YES	NA	NA	NA	YES	NA	-	-	+	-	-	+	+	-	-	/	+	-	S. C. Ho	2015
28	F	3	del	46,XY,del(15)(q26.2)	NA		YES	NA	NA	NA	NO	NA	+	-	+	-	+	+	+	-	+	/	+	dysplastic kidneys	S. C. Ho	2015
29	M	3.2	del	46.XY,del(15)(q26.3)	NA		YES	NA	NA	NA	NO	NA	-	-	+	-	-	+	-	-	+	/	-	Feeding difficulty	S. C. Ho	2015
30	F	0.5	del	46,XX,r(15)(p13q26.3)	NA		YES	NA	NA	NA	YES	NA	+	-	+	-	-	+	+	-	+	/	-	Hypotonia	S. C. Ho	2015
31	M	1.5	del	15q26.3	NA		NO	NA	NA	NA	NO	NA	-	-	+	-	-	+	-	-	-	/	+	Stocky build, increased skinfold	S. C. Ho	2015
32	M	6.75	del	15q26.1	90,517,962-91,039,825	GRCh36/hg18	NO	NO	NO	NO	NO	520kb	-	-	-	-	-	-	-	-	+	-	-	behavioral disorder, epilepsy, and autism spectrum disorder	B. Kamien	2014
33	M	25	del	15q26.1	93,203,932-93,619,522	GRCh37/hg19	NO	NO	NO	NO	NO	415kb	-	-	+	-	-	+	-	-	+	+	+	psychiatric disorder,seizure,obesity	C. Courage	2014
34	M	22	del	15q26.1	91,203,932-91,619,522	GRCh36/hg18	NO	NO	NO	NO	NO	106kb	NA	NA	-	-	-	-	-	-	+	-	+	micropenis and testes in the inguinal canal,obesity,seizure	C. Courage	2014
35	M	7	del	15q26.3	99,434,081-99,435,876	GRCh37/hg19	YES	NO	NO	NO	NO	2kb	NA	NA	-	-	-	+	+	-	+	+	-	-	J. Witsch	2013
36	F	31	del	15q26.3	99,424,326–99,439,855	GRCh37/hg19	YES	NO	NO	NO	NO	2kb	NA	NA	-	-	-	-	NA	NA	-	-	-	-	J. Witsch	2013
37	M	21	del	15q26.3	99,403,439-99,443,615	GRCh37/hg19	YES	NO	NO	NO	NO	40kb	NA	NA	-	-	-	+	+	-	-	+	-	-	J. Witsch	2013
38	M	4	del	15q26.3	99,403,439-99,443,615	GRCh37/hg19	YES	NO	NO	NO	NO	40kb	NA	NA	+	-	-	+	-	-	-	+	-	-	J. Witsch	2013
39	F	40	dup	15q26.3	102,025,982-102,311,246	GRCh37/hg19	NO(DUP)	NO(DUP)	NO(DUP)	NO(DUP)	NO	290kb	-	-	-	-	-	-	-	-	+	-	-	-	K. F. Schilter	2013
40	F	8.5	del	15q26.2-qter	95,672,055-102,531,392	GRCh37/hg19	YES	YES	YES	YES	NO	6.87	-	-	+	-	+	+	+	-	+	-	+	-	M. Poot	2013
41	M	3	del	15q26.2	92,282,797-94,500,921	GRCh36/hg18	NO	NO	NO	NO	NO	2.2	NA	NA	-	-	+	+	+	-	+	NA	+	Mild hypotonia	S. R. Lalani	2013
42	F	10	del	15q26.2	92,282,797-94,500,921	GRCh36/hg18	NO	NO	NO	NO	NO	2.2	NA	NA	-	-	+	+	+	-	+	+	+	Decreased bulk of the musculature with mild hypotonia	S. R. Lalani	2013
43	F	6	del	15q26.1	93,412,860-93,923,856	GRCh37/hg 19	NO	NO	NO	NO	NO	511kb	NA	NA	-	-	-	+	-	-	+	+	-	epilepsy, autistic behavior	L. P. Capelli	2012
44	F	28	del	15q26.2q26.3	94,810,000-100,338,900	GRCh36/hg18	YES	NO	YES	YES	YES	5.5	+	-	+	-	-	+	+	-	+	+	+	acanthosis nigricans, dry skin, subclinical hypothyroidism,Café-au-lait spots	R. S. Guilherme	2012
45	F	3.67	del	15q26.2-26.3	94,844,379-100,222,647	GRCh36/hg18	YES	YES	YES	YES	NO	5.4	-	-	+	-	-	-	+	-	+	+	+	-	S. Spengler	2012
46	F	15	del	15q26.3-ter	96,825,000-100,225,000	ISCN 2009 standards	YES	YES	YES	YES	NO	3.4	+	-	+	-	-	+	+	-	-	+	+	hearing loss of central origin	Aleksandra Jezela-Stanek	2011
47	M	fetus	dup	15q26.2-q26.3	95,490,272-100,200,967	GRCh36/hg18	YES(dup)	NO(DUP)	YES(dup)	YES(dup)	NO	4.71	-	+	/	/	-	/	-	+	+	/	NA	-	C. P. Chen	2011
48	M	4.1	del	15(q26.2-qter)	/		YES	YES	YES	YES	NO	8.58	+	-	+	-	+	NA	+	-	+	NA	+	multicystic dysplastic kidney disease,a right cryptorchidism	J. H. Choi	2011
49	F	4.42	del	15q26.2-qter	98,461,392-102,531,392	GRCh37/hg19	YES	NO	YES	YES	NO	4.07	+	-	+	-	-	NA	-	-	+	+	+	Cryptorchidism	L. I. Rudak	2011
50	F	9	del	15q26.1	90,633,409-91,364,628	GRCh36/hg18	NO	NO	NO	NO	NO	730kb	-	-	+	-	-	+	+	-	+	+	-	Seizure	R. Dhamija	2011
51	F	13.75	del	15q26.2-ter	97,517,453-102,531,392	NA	YES	NO	YES	YES	NO	5.01	+	-	+	-	+	+	-	-	-	-	-	-	S. Dateki	2011
52	F	1.25	del	15q26.2-qter	chr15:96754996-102521392	GRCh37/hg19	YES	YES	YES	YES	NO	5.78	+	-	+	-	+	+	+	-	+	+	+	gastroesophageal reflux; Bilateral grade 4 vesicoureteral reflux (VUR) and small kidneys	Eiki Nakamura	2011
53	M	13.8	del	15q26.3	99,477,911-99,572,670	GRCh37/hg19	YES	NO	NO	NO	NO	95kb	-	-	+	-	NA	-	-	-	+	+	+	otitis,Café-au-lait spots	D. C. Veenma	2010
54	M	2.6	del	15q26.3	96,799,060-98,788,607	NA	YES	NA	NA	NA	NO	1.99	+	-	+	-	-	-	-	-	-	-	-	entered puberty spontaneously	J. D. Cody	2010
55	F	12	del	15q26.3	97020968-99616263	GRCh37/hg19	YES	NO	NO	NO	NO	2.6	+	-	+	-	NA	+	-	-	+	+	+	Weight gain	S. Bruce	2010
56	F	2	del	15q26.2qter	96,990,988-102,531,392	GRCh37/hg19	YES	NO	YES	YES	NO	5.54	+	-	+	-	-	-	-	-	+	NA	+	-	S. Y. Lin	2010
57	F	2.5	del	15q26.1q26.2	87,796,000-92,700,000	NCBI35/hg17	NO	NO	NO	NO	NO	5	+	-	+	-	+	+	+	-	+	+	+	congenital 1810hypothyroidism, seizures,redundant nuchal skin,cerebellar vermis hypoplasia,limb hypotonia	C. Veredice	2009
58	M	17	del	15q26.3	99,263,801-102,531,392	NA	YES	NO	YES	YES	NO	3.27	+	-	+	-	-	+	NA	NA	+	+	+	-	W. A. Ester	2009
59	F	8.33	del	15q26.3	98,082,278-102,531,392	NA	YES	NO	YES	YES	NO	4.45	+	-	-	-	-	+	-	-	+	-	+	-	W. A. Ester	2009
60	F	12	del	15q26.2qter	92,200,000-100,100,000	GRCh36/hg18	YES	YES	YES	YES	NO	8	+	-	+	-	+	+	+	-	+	NA	+	scoliosis,hypotonia with slight peripheral hypertonia, myopia and a slight reduction in corticomedullary differentiation of kidney	C. Gervasini	2008
61	M	1.83	del	15q26.2qter	93,860,000-102,531,392	GRCh37/hg19	YES	YES	YES	YES	NO	6.48	-	-	+	-	+	-	-	-	+	-	+	relaxation of the right side of the diaphragm	Davidsson	2008
62	F	15	del	15q26.2-qter	97,330,000-102,531,392	GRCh37/hg19	YES	NO	YES	YES	NO	5.2	+	-	+	-	-	NA	+	-	+	+	-	-	M. J. Walenkamp	2008
63	M	5.5	del	15q26.1-q26.2	89,197,342 –92,489,641	NCBI35/hg17	NO	NO	NO	NO	NO	3.3	NA	NA	+	-	-	+	+	-	+	+	-	Hirsutism,Seizure	M. M. Li	2008
64	F	35	del	15q26.2-qter	96,730,000-102531392	GRCh37/hg19	YES	YES	YES	YES	NO	5.8	-	-	+	-	-	+	+	-	+	-	+	Truncal obesity,Café-au-lait spots	Rump	2008
65	M	34	del	15q26.2-qter	96,730,000-102531392	GRCh37/hg19	YES	YES	YES	YES	NO	5.8	-	-	+	-	+	+	+	-	+	-	+	a small penis with mild hypospadia, hypoplastic scrotum and cryptorchidism	Rump	2008
66	F	fetus	del	15q26.1-qter	89,241,956-ter	NA	YES	YES	YES	YES	YES	13.3	+	-	+	-	-	/	NA	NA	+	/	/	A left sided diaphragmatic hernia with herniation of the liver and stomach associated with lung hypoplasia and hypoplastic and polycystic kidneys were detected in the autopsy	E. Hatem	2007
67	F	infant	del	15q26.1-qter	NA		YES	YES	YES	YES	NO	11.2	+	-	/	/	+	/	NA	NA	+	/	+	CDH	M. Klaassens	2007
68	F	2	del	15q26.2-qter	98,002,467-102,531,392	GRCh37/hg19	YES	NO	YES	YES	NO	4.53	NA	NA	+	-	-	+	+	-	+	+	+	Talipes equinovarus, genu recurvatum	Rujirabanjerd	2007
69	F	4	dup	15q26.1-ter	/		YES(dup)	YES(dup)	YES(dup)	YES(dup)	NO	NA	-	+	-	+	NA	NA	-	-	+	+	NA	-	S.G. Kant	2007
70	F	infant	del	15q26.1-26.3	90,318,339 –99,149,459	NA	YES	YES	YES	NA	NO	8	+	-	/	/	+	/	NA	NA	+	/	+	Severe pulmonary hypoplasia	A. Slavotinek	2006
71	F	infant	del	15q26.2	95,883,860 –96,766,282	NA	NO	NA	NO	NO	NO	1	-	-	/	-	+	/	NA	NA	+	/	+	Hirsutism,Renal anomalies Double uterus/vagina,CDH,Single umbilical artery	A. Slavotinek	2006
72	F	fetus	del	15q26.1-qter	NA		YES	YES	YES	YES	NO	NA	+	-	/	/	+	/	NA	NA	NA	/	+	diaphragmatic hernia	I. Lopez	2006
73	F	0.42	del	15q26.1-qter	NA		YES	YES	YES	YES	NO	NA	+	-	+	-	+	NA	+	-	+	+	+	lung hypoplasia, kidney anomaly, biliary atresia,Spinal cord abnormality	Bhakta	2005
74	F	4.5	del	15q26.2-qter	96,820,507-102531392	GRCh37/hg19	YES	YES	YES	YES	NO	5.71	-	-	+	-	-	+	+	-	+	+	+	Cubitus valgus,rocker-bottom feet	Pinson	2005
75	F	5	del	15q26.1-qter	NA		YES	NA	NA	NA	NO	NA	+	-	+	-	+	+	NA	NA	+	+	+	Lung hypoplasia,Relaxation of diaphragm	E. Hammer	2004
76	F	1.17	del	15q26.1-qter	NA		YES	YES	YES	YES	NO	NA	-	-	/	/	+	/	NA	NA	+	NA	+	lung hypoplasia, CDH	J. R. Biggio	2004
77	F	10	del	15q26.1-qter	NA		YES	YES	YES	YES	NO	NA	+	-	+	-	+	+	-	-	+	+	+	Café-au-lait spots	Y. Okubo	2003
78	F	0.33	del	15q26.2-qter	NA		YES	NA	YES	YES	YES	NA	+	-	+	-	NA	+	+	-	+	NA	+	-	Harada N	2002
79	F	1.33	del	15q26.1-qter	94,711,170-102531392	GRCh37/hg19	YES	YES	YES	YES	NO	7.82	+	-	+	-	+	+	+	-	+	NA	NA	pressure difference between the upper and the lowerextremities	H. Tonnies	2001
80	M	9	del	15q26	/		YES	NA	NA	NA	YES	NA	-	-	+	-	-	+	+	-	+	+	+	Hypotonia,Café-au-lait spots	R. Peoples	1995
81	M	12	del	15q26	/		YES	NA	NA	NA	YES	NA	NA	NA	+	-	-	+	+	-	+	NA	+	history of dislocated hip repair, club feel repair, and orchiopexy	R. Peoples	1995
82	M	9	del	15q26	/		YES	NA	NA	NA	YES	NA	+	-	+	-	+	+	+	-	+	+	+	-	R. Peoples	1995
83	F	15	del	15q26	/		NO	NA	NA	NA	YES	NA	+	-	+	-	-	+	+	-	+	+	+	Cryptorchidism,Hypospadias,Café-au-lait spots	R. Peoples	1995
84	F	10	del	15q26	/		NO	NA	NA	NA	YES	NA	NA	NA	+	-	-	-	+	-	+	+	+	Café-au-lait spots	R. Peoples	1995
85	F	infant	del	15q26.1-qter	NA		YES	YES	YES	YES	NO	NA	+	-	/	/	+	/	NA	NA	+	/	+	dextrocardia, accessory spleens,moderate lung hypoplasia, left diaphragmatic hernia,	Siebler	1995
86	F	12.3	del	15q26.1-qter	NA		YES	YES	YES	YES	NO	NA	+	-	+	-	-	+	NA	NA	+	NA	+	-	Siebler	1995
87	F	11	del	15q26.3	/		YES	NA	NA	NA	YES	NA	+	-	+	-	-	+	+	-	+	+	+	Café-au-lait spots	T. Tamura	1993
88	F	1	del	15q26.1-qter	/		YES	YES	YES	YES	NO	NA	+	-	+	-	-	NA	+	-	+	NA	+	diastasis recti,sacral dimple,hypotonia	E. W. Roback	1991
